# Supplementary material
Source: PubMed Central journal article supplement (PMC4285361)
Supplement: NIHMS651986-supplement-leu2013280x1_pdf.pdf [file NIHMS651986-supplement-leu2013280x1_pdf.pdf]

**Supplementary Table 1: Abnormal karyotypes for 90 MLL-G patients**

| Patient No.                                 | Subgroup             | Karyotype                                                                                                                            |
|---------------------------------------------|----------------------|--------------------------------------------------------------------------------------------------------------------------------------|
| <b>Cytogenetic Good Risk Group*</b>         |                      |                                                                                                                                      |
| 1                                           | HeH                  | 53~55,inc                                                                                                                            |
| 2                                           | HeH                  | 54,XX,+X,+4,+6,+10,+14,+17,+18,+21[14]                                                                                               |
| 3                                           | HeH                  | 54,XY,+X,+4,+6,+10,+14,+17,+21[cp2]                                                                                                  |
| 4                                           | HeH                  | 54,XY,+X,+4,+6,+14,+17,+18,+21,+21[9]                                                                                                |
| 5                                           | HeH                  | 54-55,XY,+X,+4,+5,+8,+14,+17,+18,+21[cp8]                                                                                            |
| 6                                           | HeH                  | 55,XX,+X,+4,+6,+8,+14,+17,+18,+21,+21[3]                                                                                             |
| 7                                           | HeH                  | 55,XY,+3,+4,+8,-11,+17,+18,+20,+20,+21,+21,+21[12]                                                                                   |
| 8                                           | HeH                  | 55,XY,+X,+4,+6,+10,+14,+17,+18,+21,+21                                                                                               |
| 9                                           | HeH                  | 55,XY,+X,+4,+6,+10,+14,+17,+18,+21,+21[8]                                                                                            |
| 10                                          | HeH                  | 56-60,XY,+X,+4,+6,+7,+10,+11,+12,+12,+14,+17,+?19,+21,+22,+mar[cp4]                                                                  |
| 11                                          | HeH                  | 57,XY,+X,+Y,+4,+6,+8,+?9,+14,+17,+18,+21,+21                                                                                         |
| 12                                          | HeH                  | 57,XY,+X,+Y,+6,+8,+10,+14,+14,+18,+18,+21,+21[16]                                                                                    |
| 13                                          | HeH                  | 60,XY,+X,+4,+5,+6,+7,+8,+10,+12,+14,+17,+18,+21,+21,+22[7]                                                                           |
| 14                                          | HeH                  | 64,XX,+2,+4,+4,+5,+6,+8,+8,+10,+10,+11,+12,+14,+14,+17,+18,+21,+21,+22[7] **                                                         |
| 15                                          | HeH                  | hyperdiploid                                                                                                                         |
| <b>Cytogenetic Intermediate Risk Group*</b> |                      |                                                                                                                                      |
| 16                                          | Abnormal 15q         | 46,XX,add(5)(p1?5),t(7;12)(p1?5;q1?5),del(15)(q15q22)                                                                                |
| 17                                          | Abnormal 15q         | 46,XX,der(15;20)(p10;q10),+mar[5]                                                                                                    |
| 18                                          | Abnormal 15q         | 46,XX,der(5)inv(5)(p15.1q13)t(5;19;15)(q13;q13.3;q11.2),<br>der(15)t(5;19;15)(q13;q13.3;q11.2),der(19)t(5;19;15)(q13;q13.3;q11.2)[7] |
| 19                                          | Abnormal 15q         | 46,XX,del(9)(p13),del(15)(q22),t(18;19)(p11;p13)                                                                                     |
| 20                                          | Abnormal 15q         | 46,XX,ins(15;14)(q1?3;q32q11.2)                                                                                                      |
| 21                                          | Abnormal 15q         | 46,XX,t(5;15)(p15;q13~15),del(6)(p21p23~25),inc[cp7]                                                                                 |
| 22                                          | Abnormal 15q         | 46,XY,del(9)(p11)[4]/46,idem,t(8;15)(q2?4;<br>q2?5)[4]                                                                               |
| 23                                          | Abnormal 15q         | 46,XY,der(14)inv(14)(q1?3q?24)ins(14;15)(q1?3;q?14q?22.1),der(15)ins(14;15)[8]                                                       |
| 24                                          | Abnormal 15q         | 46,XY,t(15;17)(q1?5;q1?)                                                                                                             |
| 25                                          | Abnormal 15q         | 46,XY,t(5;15)(p15;q11)[5]                                                                                                            |
| 26                                          | Abnormal 15q         | 46,XY,t(7;15)(q22;q21)                                                                                                               |
| 27                                          | Abnormal 15q         | 48,XX,-15,+22,+mar1,+mar2                                                                                                            |
| 28                                          | <i>PICALM-MLLT10</i> | 46,XX,t(10;11)(p13;q14)                                                                                                              |
| 29                                          | <i>PICALM-MLLT10</i> | 47XX,+5,t(10;11)(p13;q14)                                                                                                            |
| 30                                          | dic(9;20)            | 45,XX,dic(9;20)(p11~13;q11)                                                                                                          |
| 31                                          | dic(9;20)            | 46,XX,dic(9;20)(p11~13;q11)                                                                                                          |
| 32                                          | t(1;19)              | 46,XX,t(1;19)(q23;p13)                                                                                                               |

|    |                  |                                                                                                    |
|----|------------------|----------------------------------------------------------------------------------------------------|
| 33 | t(1;19)          | 46,XY,der(19)t(1;19)(q23;p13)[3]                                                                   |
| 34 | t(7;12)          | 46,XX,del(7)(q31),del(12)(p13) ***                                                                 |
| 35 | t(7;12)          | 46,XX,del(7)(q32q36)[13]/47,idem,+19[17] ***                                                       |
| 36 | t(7;12)          | 51,XY,+8,+13,+14,+19,+22,t(7;12)(q36;p13)                                                          |
| 37 | <i>TRA/D-MYC</i> | 46 XX,t(8;14)(q24;q11)[6]                                                                          |
| 38 | Other            | 43~45,XX,inc[3]                                                                                    |
| 39 | Other            | 44~45,XY,inc[cp]                                                                                   |
| 40 | Other            | 44~46,XX,-X,+2,-9,-9,add(12)(p1?3),del(12)(p11.2),+2mar[cp7]                                       |
| 41 | Other            | 45,XX,-7[20]                                                                                       |
| 42 | Other            | 45,XX,t(6;14)(p2?2;q?13),-11,der(19)t(?11;19)(q?21;p13)[5]                                         |
| 43 | Other            | 45,XY,dic(7;9)(q11.1;p21)[9]                                                                       |
| 44 | Other            | 45,XY,t(1;5)(q21;q33),-9,inc[4]/45,idem,add(7)(p22)[6]                                             |
| 45 | Other            | 45~46,XX,add(12)(p13),inc[cp4]                                                                     |
| 46 | Other            | 46 XX,add(9)(p13)                                                                                  |
| 47 | Other            | 46,XX,add(16)(q?23),inc[3]                                                                         |
| 48 | Other            | 46,XX,add(19)(p13)[16]                                                                             |
| 49 | Other            | 46,X,add(X)(q28),t(1;9;12)(q21;q13;q24),inc[3]                                                     |
| 50 | Other            | 46,XX,del(11)(q13)                                                                                 |
| 51 | Other            | 46,XX,del(12)(p11.2p13)[6]                                                                         |
| 52 | Other            | 46,XX,del(2)(q3?5)                                                                                 |
| 53 | Other            | 46,XX,del(6)(q21)[5]                                                                               |
| 54 | Other            | 46,XX,del(9)(p13)                                                                                  |
| 55 | Other            | 46,XX,der(9)t(9;14)(p24;q11.2),-14,-15,+2mar[4]                                                    |
| 56 | Other            | 46,XY,+1,der(1;14)(q10;q10),del(9)(p13)[5]                                                         |
| 57 | Other            | 46,XY,-11,+21c[3]                                                                                  |
| 58 | Other            | 46,XY,add(11)(q23)[19]                                                                             |
| 59 | Other            | 46,XY,add(4)(q21),add(8)(q24),der(11)add(11)(p12)del(11)(q13)[20]                                  |
| 60 | Other            | 46,XY,add(5)(q)x2                                                                                  |
| 61 | Other            | 46,XY,del(11)(q23)[6]                                                                              |
| 62 | Other            | 46,XY,del(9)(p13)                                                                                  |
| 63 | Other            | 46,XY,der(4)t(1;4)(q12;q35)[8]/47,XY,+8[4]                                                         |
| 64 | Other            | 46,XY,der(9)del(9)(p21p21)ins(9;21)(p13~21;q22q22),der(9)t(9;21)p13;q22,der(21)t(9;21)(p21;q22)[8] |
| 65 | Other            | 46,XY,dic(7;9)(p11;p11),+mar                                                                       |
| 66 | Other            | 46,XY,ins(13;11)(q12;q13q23)[6]                                                                    |
| 67 | Other            | 46,XY,inv(11)(q13q23)                                                                              |
| 68 | Other            | 46,XY,t(10;18)(q11;q23)                                                                            |
| 69 | Other            | 46,XY,t(14;18)(q13;q22.2)[7]                                                                       |

|                                     |                  |                                                                           |
|-------------------------------------|------------------|---------------------------------------------------------------------------|
| 70                                  | Other            | 46,XY,t(7;11)(p22;p13)[9]                                                 |
| 71                                  | Other            | 46,XY,t(7;9;16)(q11;p13;p11)                                              |
| 72                                  | Other            | 46,Y,add(X)(q24)[8]/46,idem,del(6)(q13q25)[2]                             |
| 73                                  | Other            | 46,Y,t(X;10)(p11.2;p11.2)[7]                                              |
| 74                                  | Other            | 47,XX,+8[20]                                                              |
| 75                                  | Other            | 47,XX,-4,add(11)(q2?3),+2mar[2]                                           |
| 76                                  | Other            | 47,XY,+8[15]                                                              |
| 77                                  | Other            | 47,Y,t(X;11)(q28;p15),+inv dup(7)(q31qter)[20]                            |
| 78                                  | Other            | 48,XY,+der(8;21)(q10;q10)x2[14]                                           |
| 79                                  | Other            | 48,XY,+X,dic(1;19)(q25;p13.3),+6,+22[5]                                   |
| 80                                  | Other            | 48~49,XX,+5,+10,+21[cp3]                                                  |
| <b>Cytogenetic Poor Risk Group*</b> |                  |                                                                           |
| 81                                  | del(13q)         | 45,XX,del(6)(q15q23),dic(7;9)(p11.2;p11),-13,del(20)(q11.2q13.1),+mar[15] |
| 82                                  | del(13q)         | 46,XX,del(3)(q?),del(11)(q?),add(13)(q34),t(14;18)(q11;q21),inc[cp8]      |
| 83                                  | del(13q)         | 46,XX,der(9)t(9;13)(p1?2;q22)del(9)(p1?2p2?4),del(13)(q1?2;q22)           |
| 84                                  | del(13q)         | 46,XY,del(13)(q21q32)[6]                                                  |
| 85                                  | del(13q)/t(1;19) | 46,XY,t(1;19)(q23;p13.3),-13,+mar[13]                                     |
| 86                                  | del(17p)         | 43~46,XY,r(1),-17,-19,+13,+mar[cp19]                                      |
| 87                                  | del(17p)         | 46,XY,-6,-10,-17,+3mar[14]                                                |
| 88                                  | del(17p)         | 46,XY,del(7)(p13p15),add(17)(p1?3),add(21)(q22)[10]                       |
| 89                                  | <i>BCR-ABL1</i>  | 46,XY,t(9;22)(q34;q11.2)[9]                                               |
| 90                                  | <i>BCR-ABL1</i>  | 48,XY,t(9;22)(q34;q11.2),+2mar[4]                                         |

Key:

The 90 patients listed here have abnormal karyotypes. Patients 91-124 had a normal karyotype based on the analysis of at least 10 (usually 20) normal metaphases. Patients 125-162 had no or failed cytogenetic result.

Among the 90 patients with an abnormal karyotype, normal clone is omitted from the karyotype string. Abnormal cell numbers are given in square brackets where available, where not available the chromosomal abnormalities were known to be clonal: present in two or more cells for chromosomal gains or structural rearrangements, in three or more cells for chromosome loss.

\* Definition of cytogenetic risk group as per Moorman et al (2010) Lancet Oncology 11:429-438

\*\* Karyotype suggests doubling of a low hypodiploid clone

\*\*\* Possible t(7;12)(q36;p13)

HeH, high hyperdiploidy

Abnormal 15q, abnormality involving the long arm of chromosome 15

Other, all listed abnormalities excluded
