# Supplementary material
Source: PubMed Central journal article supplement (PMC4285361)
Supplement: NIHMS651986-supplement-leu2013280x2_pdf.pdf [file NIHMS651986-supplement-leu2013280x2_pdf.pdf]

**Supplementary Table 2: Baseline characteristics by cytogenetic risk group in 88 Interfant-99 patients**

| Patient characteristics      | Total |      | Cytogenetic Risk Group |      |              |      |      |      |
|------------------------------|-------|------|------------------------|------|--------------|------|------|------|
|                              |       |      | Good                   |      | Intermediate |      | Poor |      |
|                              | N     | %    | N                      | %    | N            | %    | N    | %    |
| <b>Total</b>                 | 88    | 100  | 9                      | 10.3 | 73           | 82.9 | 6    | 6.8  |
| <b>Sex</b>                   |       |      |                        |      |              |      |      |      |
| Female                       | 45    | 51.1 | 8                      | 88.9 | 33           | 45.2 | 4    | 66.7 |
| Male                         | 43    | 48.9 | 1                      | 11.1 | 40           | 54.8 | 2    | 33.3 |
| <b>Age (months)</b>          |       |      |                        |      |              |      |      |      |
| 0-3                          | 6     | 6.8  | 0                      | 0    | 6            | 8.2  | 0    | 0    |
| 3-6                          | 11    | 12.5 | 0                      | 0    | 11           | 15.1 | 0    | 0    |
| 6-9                          | 24    | 27.3 | 3                      | 33.3 | 21           | 28.8 | 0    | 0    |
| 9-12                         | 47    | 53.4 | 6                      | 66.7 | 35           | 47.9 | 6    | 100  |
| <b>WBC (cells per L)</b>     |       |      |                        |      |              |      |      |      |
| <100×10 <sup>9</sup>         | 56    | 63.6 | 9                      | 100  | 43           | 58.9 | 4    | 66.7 |
| 100 - 300×10 <sup>9</sup>    | 22    | 25   | 0                      | 0    | 20           | 27.4 | 2    | 33.3 |
| ≥300×10 <sup>9</sup>         | 10    | 11.4 | 0                      | 0    | 10           | 13.7 | 0    | 0    |
| <b>Prednisolone response</b> |       |      |                        |      |              |      |      |      |
| PGR                          | 63    | 71.6 | 8                      | 88.9 | 52           | 71.2 | 3    | 50   |
| PPR                          | 22    | 25   | 1                      | 11.1 | 19           | 26   | 2    | 33.3 |
| Not known                    | 3     | 3.4  | 0                      | 0    | 2            | 2.7  | 1    | 16.7 |
