# Supplementary material
Source: PubMed Central journal article supplement (PMC4285361)

### Supplementary Figure 1

Graph showing intensity of FLT3 expression among 97 patients from COG P9047 tested by gene expression profiling 14. Each point represents a single patient, with *MLL-R* (black dots) and *MLL-G* (yellow open circles) identified. The intensity ranges from 3.88 to 10.95. Ten of the 17 *MLL-G* patients included in this showed the lowest expression (3.88 to 6.31) and seven were classified as high intensity (7.52 to 10.21). Only one *MLL-R* patient had low FLT3 expression: with a *MLL-MLLT3 (MLL-AF9)* fusion.

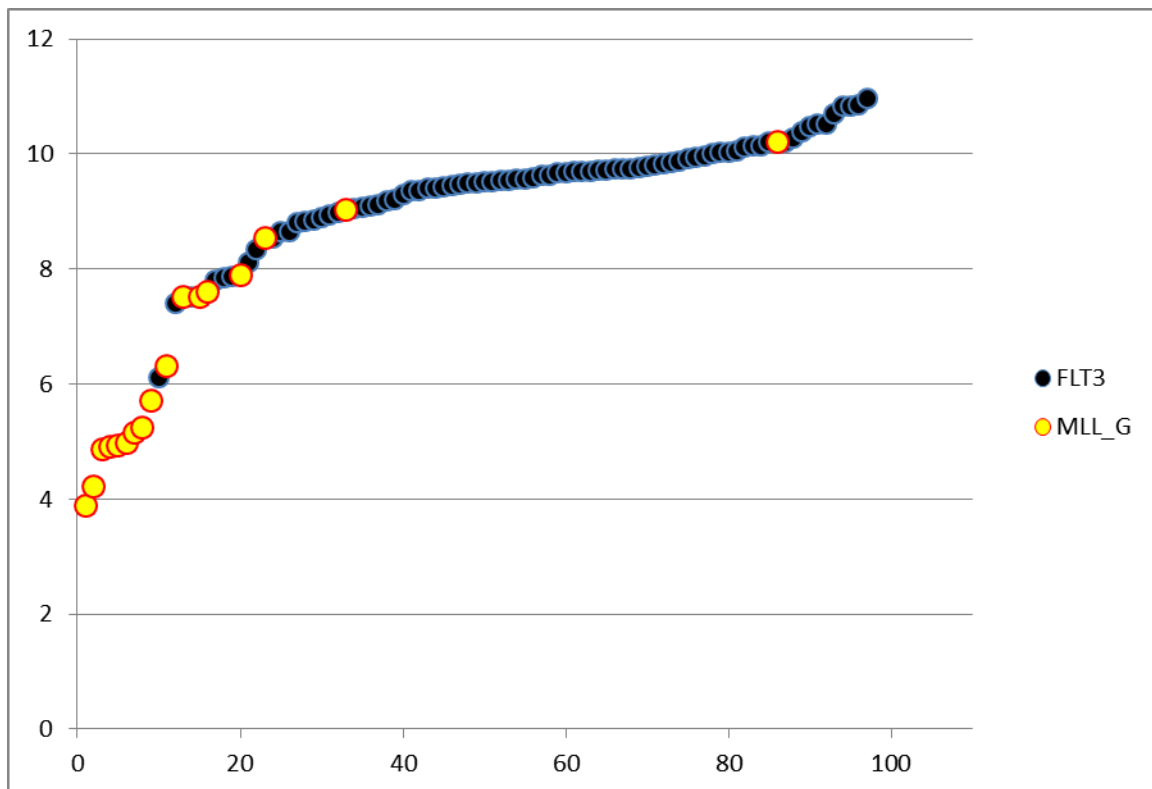

Supplement: NIHMS651986-supplement-leu2013280x4_pdf.pdf [file NIHMS651986-supplement-leu2013280x4_pdf.pdf]
